# Supplementary material for: Wide-field optical mapping of neural activity and brain haemodynamics: considerations and novel approaches
Source: PubMed Central journal article supplement (PMC5003860; doi:10.1098/rstb.2015.0360), 2016-10-05
Supplement: rstb20150360supp1.pdf [file rstb20150360supp1.pdf]

## High-speed, wide-field optical mapping (WFOM) of neural activity and brain haemodynamics: Considerations and novel approaches

### Appendix A

#### Tabulated Molar Extinction Coefficient for Hemoglobin in Water

These values for the molar extinction coefficient  $\epsilon$  were compiled by Scott Prahl (Oregon Tech) [1] using data from:

W. B. Gratzler, Med. Res. Council Labs, Holly Hill, London

N. Kollias, Wellman Laboratories, Harvard Medical School, Boston

To convert this data to absorbance  $A$ , multiply the molar extinction coefficient  $\epsilon$  [units:  $\text{cm}^{-1} \text{M}^{-1}$  where  $\text{M} = \text{mol/L}$ ] by the molar concentration  $C$  [units:  $\text{M}$ ] and the pathlength  $X$  [units:  $\text{cm}$ ].

$$A = \epsilon CX$$

If  $c$  is the concentration in  $[\text{g/L}]$ , absorbance  $A$  is given by:

$$A = \frac{\epsilon c X}{64,500}$$

where 64,500 is the gram molecular weight [units:  $\text{g/mol}$ ] of hemoglobin.

To convert the molar extinction coefficient  $\epsilon$  to absorption coefficient  $\mu_a$  in  $[\text{cm}^{-1}]$ , multiply by 2.303, the concentration in  $[\text{g/L}]$  and divide by the gram molecular weight of hemoglobin:

$$\mu_a = \frac{2.303 \epsilon c}{64,500}$$

A typical value of  $c$  for hemoglobin in whole blood is  $c = 150 \text{ g/liter}$ .

#### Tabulated molar extinction coefficient $\epsilon$ for oxy and deoxyhemoglobin ( $\text{HbO}_2$ and $\text{HbR}$ ):

| Wavelength (nm) | $\epsilon \text{ HbO}_2 (\text{cm}^{-1} \text{M}^{-1})$ | $\epsilon \text{ HbR} (\text{cm}^{-1} \text{M}^{-1})$ |
|-----------------|---------------------------------------------------------|-------------------------------------------------------|
| 250             | 106112                                                  | 112736                                                |
| 252             | 105552                                                  | 112736                                                |
| 254             | 107660                                                  | 112736                                                |
| 256             | 109788                                                  | 113824                                                |
| 258             | 112944                                                  | 115040                                                |
| 260             | 116376                                                  | 116296                                                |
| 262             | 120188                                                  | 117564                                                |
| 264             | 124412                                                  | 118876                                                |
| 266             | 128696                                                  | 120208                                                |
| 268             | 133064                                                  | 121544                                                |

|     |        |        |
|-----|--------|--------|
| 270 | 136068 | 122880 |
| 272 | 137232 | 123096 |
| 274 | 138408 | 121952 |
| 276 | 137424 | 120808 |
| 278 | 135820 | 119840 |
| 280 | 131936 | 118872 |
| 282 | 127720 | 117628 |
| 284 | 122280 | 114820 |
| 286 | 116508 | 112008 |
| 288 | 108484 | 107140 |
| 290 | 104752 | 98364  |
| 292 | 98936  | 91636  |
| 294 | 88136  | 85820  |
| 296 | 79316  | 77100  |
| 298 | 70884  | 69444  |
| 300 | 65972  | 64440  |
| 302 | 63208  | 61300  |
| 304 | 61952  | 58828  |
| 306 | 62352  | 56908  |
| 308 | 62856  | 57620  |
| 310 | 63352  | 59156  |
| 312 | 65972  | 62248  |
| 314 | 69016  | 65344  |
| 316 | 72404  | 68312  |
| 318 | 75536  | 71208  |
| 320 | 78752  | 74508  |
| 322 | 82256  | 78284  |
| 324 | 85972  | 82060  |
| 326 | 89796  | 85592  |
| 328 | 93768  | 88516  |
| 330 | 97512  | 90856  |
| 332 | 100964 | 93192  |
| 334 | 103504 | 95532  |
| 336 | 104968 | 99792  |
| 338 | 106452 | 104476 |
| 340 | 107884 | 108472 |
| 342 | 109060 | 110996 |
| 344 | 110092 | 113524 |
| 346 | 109032 | 116052 |
| 348 | 107984 | 118752 |
| 350 | 106576 | 122092 |
| 352 | 105040 | 125436 |
| 354 | 103696 | 128776 |
| 356 | 101568 | 132120 |
| 358 | 97828  | 133632 |
| 360 | 94744  | 134940 |

|     |        |        |
|-----|--------|--------|
| 362 | 92248  | 136044 |
| 364 | 89836  | 136972 |
| 366 | 88484  | 137900 |
| 368 | 87512  | 138856 |
| 370 | 88176  | 139968 |
| 372 | 91592  | 141084 |
| 374 | 95140  | 142196 |
| 376 | 98936  | 143312 |
| 378 | 103432 | 144424 |
| 380 | 109564 | 145232 |
| 382 | 116968 | 145232 |
| 384 | 125420 | 148668 |
| 386 | 135132 | 153908 |
| 388 | 148100 | 159544 |
| 390 | 167748 | 167780 |
| 392 | 189740 | 180004 |
| 394 | 212060 | 191540 |
| 396 | 231612 | 202124 |
| 398 | 248404 | 212712 |
| 400 | 266232 | 223296 |
| 402 | 284224 | 236188 |
| 404 | 308716 | 253368 |
| 406 | 354208 | 270548 |
| 408 | 422320 | 287356 |
| 410 | 466840 | 303956 |
| 412 | 500200 | 321344 |
| 414 | 524280 | 342596 |
| 416 | 521880 | 363848 |
| 418 | 515520 | 385680 |
| 420 | 480360 | 407560 |
| 422 | 431880 | 429880 |
| 424 | 376236 | 461200 |
| 426 | 326032 | 481840 |
| 428 | 283112 | 500840 |
| 430 | 246072 | 528600 |
| 432 | 214120 | 552160 |
| 434 | 165332 | 552160 |
| 436 | 132820 | 547040 |
| 438 | 119140 | 501560 |
| 440 | 102580 | 413280 |
| 442 | 92780  | 363240 |
| 444 | 81444  | 282724 |
| 446 | 76324  | 237224 |
| 448 | 67044  | 173320 |
| 450 | 62816  | 103292 |
| 452 | 58864  | 62640  |

|     |         |         |
|-----|---------|---------|
| 454 | 53552   | 36170   |
| 456 | 49496   | 30698.8 |
| 458 | 47496   | 25886.4 |
| 460 | 44480   | 23388.8 |
| 462 | 41320   | 20891.2 |
| 464 | 39807.2 | 19260.8 |
| 466 | 37073.2 | 18142.4 |
| 468 | 34870.8 | 17025.6 |
| 470 | 33209.2 | 16156.4 |
| 472 | 31620   | 15310   |
| 474 | 30113.6 | 15048.4 |
| 476 | 28850.8 | 14792.8 |
| 478 | 27718   | 14657.2 |
| 480 | 26629.2 | 14550   |
| 482 | 25701.6 | 14881.2 |
| 484 | 25180.4 | 15212.4 |
| 486 | 24669.6 | 15543.6 |
| 488 | 24174.8 | 15898   |
| 490 | 23684.4 | 16684   |
| 492 | 23086.8 | 17469.6 |
| 494 | 22457.6 | 18255.6 |
| 496 | 21850.4 | 19041.2 |
| 498 | 21260   | 19891.2 |
| 500 | 20932.8 | 20862   |
| 502 | 20596.4 | 21832.8 |
| 504 | 20418   | 22803.6 |
| 506 | 19946   | 23774.4 |
| 508 | 19996   | 24745.2 |
| 510 | 20035.2 | 25773.6 |
| 512 | 20150.4 | 26936.8 |
| 514 | 20429.2 | 28100   |
| 516 | 21001.6 | 29263.2 |
| 518 | 22509.6 | 30426.4 |
| 520 | 24202.4 | 31589.6 |
| 522 | 26450.4 | 32851.2 |
| 524 | 29269.2 | 34397.6 |
| 526 | 32496.4 | 35944   |
| 528 | 35990   | 37490   |
| 530 | 39956.8 | 39036.4 |
| 532 | 43876   | 40584   |
| 534 | 46924   | 42088   |
| 536 | 49752   | 43592   |
| 538 | 51712   | 45092   |
| 540 | 53236   | 46592   |
| 542 | 53292   | 48148   |
| 544 | 52096   | 49708   |

|     |         |         |
|-----|---------|---------|
| 546 | 49868   | 51268   |
| 548 | 46660   | 52496   |
| 550 | 43016   | 53412   |
| 552 | 39675.2 | 54080   |
| 554 | 36815.2 | 54520   |
| 556 | 34476.8 | 54540   |
| 558 | 33456   | 54164   |
| 560 | 32613.2 | 53788   |
| 562 | 32620   | 52276   |
| 564 | 33915.6 | 50572   |
| 566 | 36495.2 | 48828   |
| 568 | 40172   | 46948   |
| 570 | 44496   | 45072   |
| 572 | 49172   | 43340   |
| 574 | 53308   | 41716   |
| 576 | 55540   | 40092   |
| 578 | 54728   | 38467.6 |
| 580 | 50104   | 37020   |
| 582 | 43304   | 35676.4 |
| 584 | 34639.6 | 34332.8 |
| 586 | 26600.4 | 32851.6 |
| 588 | 19763.2 | 31075.2 |
| 590 | 14400.8 | 28324.4 |
| 592 | 10468.4 | 25470   |
| 594 | 7678.8  | 22574.8 |
| 596 | 5683.6  | 19800   |
| 598 | 4504.4  | 17058.4 |
| 600 | 3200    | 14677.2 |
| 602 | 2664    | 13622.4 |
| 604 | 2128    | 12567.6 |
| 606 | 1789.2  | 11513.2 |
| 608 | 1647.6  | 10477.6 |
| 610 | 1506    | 9443.6  |
| 612 | 1364.4  | 8591.2  |
| 614 | 1222.8  | 7762    |
| 616 | 1110    | 7344.8  |
| 618 | 1026    | 6927.2  |
| 620 | 942     | 6509.6  |
| 622 | 858     | 6193.2  |
| 624 | 774     | 5906.8  |
| 626 | 707.6   | 5620    |
| 628 | 658.8   | 5366.8  |
| 630 | 610     | 5148.8  |
| 632 | 561.2   | 4930.8  |
| 634 | 512.4   | 4730.8  |
| 636 | 478.8   | 4602.4  |

|     |       |         |
|-----|-------|---------|
| 638 | 460.4 | 4473.6  |
| 640 | 442   | 4345.2  |
| 642 | 423.6 | 4216.8  |
| 644 | 405.2 | 4088.4  |
| 646 | 390.4 | 3965.08 |
| 648 | 379.2 | 3857.6  |
| 650 | 368   | 3750.12 |
| 652 | 356.8 | 3642.64 |
| 654 | 345.6 | 3535.16 |
| 656 | 335.2 | 3427.68 |
| 658 | 325.6 | 3320.2  |
| 660 | 319.6 | 3226.56 |
| 662 | 314   | 3140.28 |
| 664 | 308.4 | 3053.96 |
| 666 | 302.8 | 2967.68 |
| 668 | 298   | 2881.4  |
| 670 | 294   | 2795.12 |
| 672 | 290   | 2708.84 |
| 674 | 285.6 | 2627.64 |
| 676 | 282   | 2554.4  |
| 678 | 279.2 | 2481.16 |
| 680 | 277.6 | 2407.92 |
| 682 | 276   | 2334.68 |
| 684 | 274.4 | 2261.48 |
| 686 | 272.8 | 2188.24 |
| 688 | 274.4 | 2115    |
| 690 | 276   | 2051.96 |
| 692 | 277.6 | 2000.48 |
| 694 | 279.2 | 1949.04 |
| 696 | 282   | 1897.56 |
| 698 | 286   | 1846.08 |
| 700 | 290   | 1794.28 |
| 702 | 294   | 1741    |
| 704 | 298   | 1687.76 |
| 706 | 302.8 | 1634.48 |
| 708 | 308.4 | 1583.52 |
| 710 | 314   | 1540.48 |
| 712 | 319.6 | 1497.4  |
| 714 | 325.2 | 1454.36 |
| 716 | 332   | 1411.32 |
| 718 | 340   | 1368.28 |
| 720 | 348   | 1325.88 |
| 722 | 356   | 1285.16 |
| 724 | 364   | 1244.44 |
| 726 | 372.4 | 1203.68 |
| 728 | 381.2 | 1152.8  |

|     |       |         |
|-----|-------|---------|
| 730 | 390   | 1102.2  |
| 732 | 398.8 | 1102.2  |
| 734 | 407.6 | 1102.2  |
| 736 | 418.8 | 1101.76 |
| 738 | 432.4 | 1100.48 |
| 740 | 446   | 1115.88 |
| 742 | 459.6 | 1161.64 |
| 744 | 473.2 | 1207.4  |
| 746 | 487.6 | 1266.04 |
| 748 | 502.8 | 1333.24 |
| 750 | 518   | 1405.24 |
| 752 | 533.2 | 1515.32 |
| 754 | 548.4 | 1541.76 |
| 756 | 562   | 1560.48 |
| 758 | 574   | 1560.48 |
| 760 | 586   | 1548.52 |
| 762 | 598   | 1508.44 |
| 764 | 610   | 1459.56 |
| 766 | 622.8 | 1410.52 |
| 768 | 636.4 | 1361.32 |
| 770 | 650   | 1311.88 |
| 772 | 663.6 | 1262.44 |
| 774 | 677.2 | 1213    |
| 776 | 689.2 | 1163.56 |
| 778 | 699.6 | 1114.8  |
| 780 | 710   | 1075.44 |
| 782 | 720.4 | 1036.08 |
| 784 | 730.8 | 996.72  |
| 786 | 740   | 957.36  |
| 788 | 748   | 921.8   |
| 790 | 756   | 890.8   |
| 792 | 764   | 859.8   |
| 794 | 772   | 828.8   |
| 796 | 786.4 | 802.96  |
| 798 | 807.2 | 782.36  |
| 800 | 816   | 761.72  |
| 802 | 828   | 743.84  |
| 804 | 836   | 737.08  |
| 806 | 844   | 730.28  |
| 808 | 856   | 723.52  |
| 810 | 864   | 717.08  |
| 812 | 872   | 711.84  |
| 814 | 880   | 706.6   |
| 816 | 887.2 | 701.32  |
| 818 | 901.6 | 696.08  |
| 820 | 916   | 693.76  |

|     |        |        |
|-----|--------|--------|
| 822 | 930.4  | 693.6  |
| 824 | 944.8  | 693.48 |
| 826 | 956.4  | 693.32 |
| 828 | 965.2  | 693.2  |
| 830 | 974    | 693.04 |
| 832 | 982.8  | 692.92 |
| 834 | 991.6  | 692.76 |
| 836 | 1001.2 | 692.64 |
| 838 | 1011.6 | 692.48 |
| 840 | 1022   | 692.36 |
| 842 | 1032.4 | 692.2  |
| 844 | 1042.8 | 691.96 |
| 846 | 1050   | 691.76 |
| 848 | 1054   | 691.52 |
| 850 | 1058   | 691.32 |
| 852 | 1062   | 691.08 |
| 854 | 1066   | 690.88 |
| 856 | 1072.8 | 690.64 |
| 858 | 1082.4 | 692.44 |
| 860 | 1092   | 694.32 |
| 862 | 1101.6 | 696.2  |
| 864 | 1111.2 | 698.04 |
| 866 | 1118.4 | 699.92 |
| 868 | 1123.2 | 701.8  |
| 870 | 1128   | 705.84 |
| 872 | 1132.8 | 709.96 |
| 874 | 1137.6 | 714.08 |
| 876 | 1142.8 | 718.2  |
| 878 | 1148.4 | 722.32 |
| 880 | 1154   | 726.44 |
| 882 | 1159.6 | 729.84 |
| 884 | 1165.2 | 733.2  |
| 886 | 1170   | 736.6  |
| 888 | 1174   | 739.96 |
| 890 | 1178   | 743.6  |
| 892 | 1182   | 747.24 |
| 894 | 1186   | 750.88 |
| 896 | 1190   | 754.52 |
| 898 | 1194   | 758.16 |
| 900 | 1198   | 761.84 |
| 902 | 1202   | 765.04 |
| 904 | 1206   | 767.44 |
| 906 | 1209.2 | 769.8  |
| 908 | 1211.6 | 772.16 |
| 910 | 1214   | 774.56 |
| 912 | 1216.4 | 776.92 |



|      |        |         |
|------|--------|---------|
| 914  | 1218.8 | 778.4   |
| 916  | 1220.8 | 778.04  |
| 918  | 1222.4 | 777.72  |
| 920  | 1224   | 777.36  |
| 922  | 1225.6 | 777.04  |
| 924  | 1227.2 | 776.64  |
| 926  | 1226.8 | 772.36  |
| 928  | 1224.4 | 768.08  |
| 930  | 1222   | 763.84  |
| 932  | 1219.6 | 752.28  |
| 934  | 1217.2 | 737.56  |
| 936  | 1215.6 | 722.88  |
| 938  | 1214.8 | 708.16  |
| 940  | 1214   | 693.44  |
| 942  | 1213.2 | 678.72  |
| 944  | 1212.4 | 660.52  |
| 946  | 1210.4 | 641.08  |
| 948  | 1207.2 | 621.64  |
| 950  | 1204   | 602.24  |
| 952  | 1200.8 | 583.4   |
| 954  | 1197.6 | 568.92  |
| 956  | 1194   | 554.48  |
| 958  | 1190   | 540.04  |
| 960  | 1186   | 525.56  |
| 962  | 1182   | 511.12  |
| 964  | 1178   | 495.36  |
| 966  | 1173.2 | 473.32  |
| 968  | 1167.6 | 451.32  |
| 970  | 1162   | 429.32  |
| 972  | 1156.4 | 415.28  |
| 974  | 1150.8 | 402.28  |
| 976  | 1144   | 389.288 |
| 978  | 1136   | 374.944 |
| 980  | 1128   | 359.656 |
| 982  | 1120   | 344.372 |
| 984  | 1112   | 329.084 |
| 986  | 1102.4 | 313.796 |
| 988  | 1091.2 | 298.508 |
| 990  | 1080   | 283.22  |
| 992  | 1068.8 | 267.932 |
| 994  | 1057.6 | 252.648 |
| 996  | 1046.4 | 237.36  |
| 998  | 1035.2 | 222.072 |
| 1000 | 1024   | 206.784 |

## Appendix B

### Scattering and absorption properties

Values for the scattering properties of rat brain used in simulations shown here were taken from measurements presented in the thesis of Peter Van der Zee [2] with the relevant figure reproduced below:

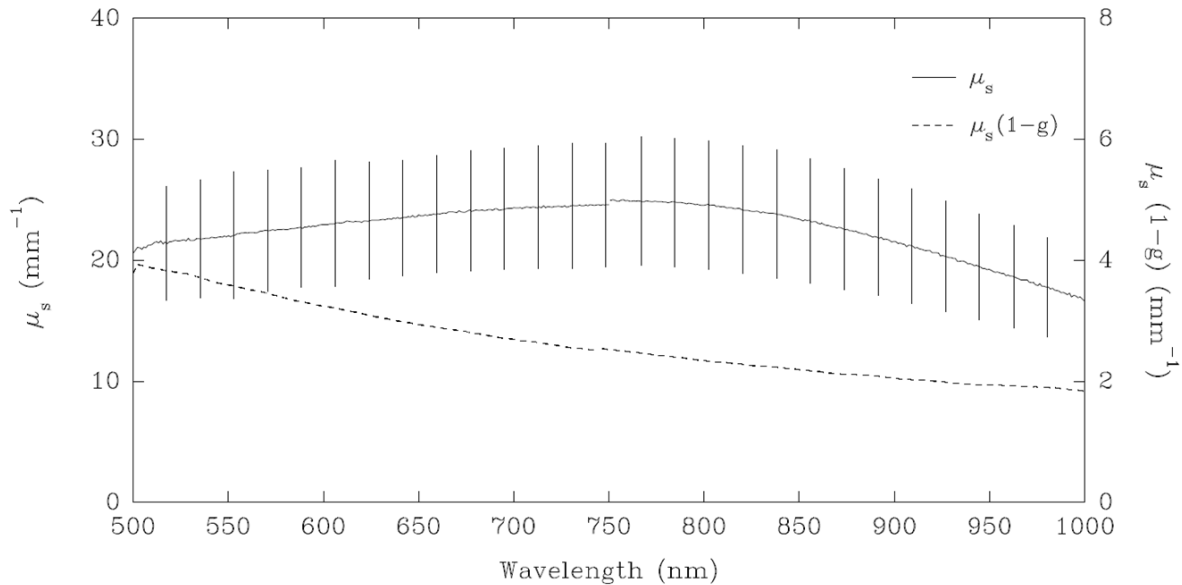

**Supp Figure 1 Scattering values taken from blood free rat brain [2] and used in models provided here.**

Here,  $\mu_s$  described the scattering coefficient (1/scattering length), while  $\mu_s' = \mu_s(1-g)$  is the reduced scattering coefficient which denotes the effective scattering coefficient if all interactions resulted in completely isotropic scattering.  $g$  is the anisotropy factor which describes the directionality of each scattering event (given by the shape, size and composition of the scatterers).  $g = 0$  represents isotropic scattering such that  $\mu_s' = \mu_s$ . The plots above allow derivation of values of  $g$  for brain tissue from  $\mu_s'$  as used in our models:

| Wavelength | $\mu_s$ (mm <sup>-1</sup> ) | $g$  | $\mu_s'$ (mm <sup>-1</sup> ) | $\mu_a$ (mm <sup>-1</sup> ) |
|------------|-----------------------------|------|------------------------------|-----------------------------|
| 488 nm     | 21                          | 0.8  | 4.2                          | 0.33                        |
| 530 nm     | 21                          | 0.82 | 3.78                         | 0.55                        |
| 630 nm     | 24                          | 0.87 | 3.12                         | 0.024                       |

Absorption values are derived from values in appendix A and assuming 3% blood in tissue and 75% average oxygen saturation.

### Monte Carlo modeling

Monte Carlo modeling simulates light propagation by repeatedly launching photons into a modeled medium with pre-defined optical properties and a specific illumination and detection geometry. The probability and direction of scattering events is given by the values of  $\mu_s$  and  $g$ . Each photon is tracked along its trajectory, recording its cumulative distance travelled, and the locations it visited along its path

as well as the location and angle at which it exits the tissue. Reciprocity is a rule that is often used in Monte Carlo models, and assumes that light propagation in one direction is equivalent to propagation in the reverse direction. Thus, to simulate, for example, illumination of a large area of a scattering surface and detection of light emerging at a point, one can simulate light entering at a point, and emerging from any point on the same surface. Depending on the sample volume, 10,000 to  $10^9$  photon launches will be needed to provide a good representation of light distribution. Two types of modeling were used here.

1) For pathlength calculation

Using reciprocity, we simulate light entering the tissue with a beam whose NA matches our camera's lens (here, 0.12). The Monte Carlo is run 'white' which means only scattering probability is considered.  $10^9$  photons that entered were tracked, and the location of exit, direction of exit and cumulative pathlength for each is recorded. To convert this data to pathlength, first, only photons exiting the surface with an angle normal to the surface were considered (analogous to unidirectional illumination of the surface with LED light). Second, the pathlength of each photon was then converted to a weight, representing its likelihood of existing based on the absorption coefficient of the medium it traveled through using the Beer Lambert law (Eq 1). The total average pathlength of light is then calculated by summing each photon's weight multiplied by its pathlength:

$$X_{DR}(\lambda) = \sum_{n=1}^N x_n e^{-\mu_a(\lambda)x_n}$$

**Supp Eq 1**

Using the values for scattering tabulated above, scattering properties have a relatively small effect of pathlength compared to the effects of absorption as shown below in Supp Figure 2. Here, pathlength was calculated using a wavelength-specific scattering model, and then accounting for corresponding wavelength-dependent absorption using Supp Eq 1. Given the similarity of these pathlength traces, the data tabulated below utilizes the scattering properties assumed for 630 nm light.

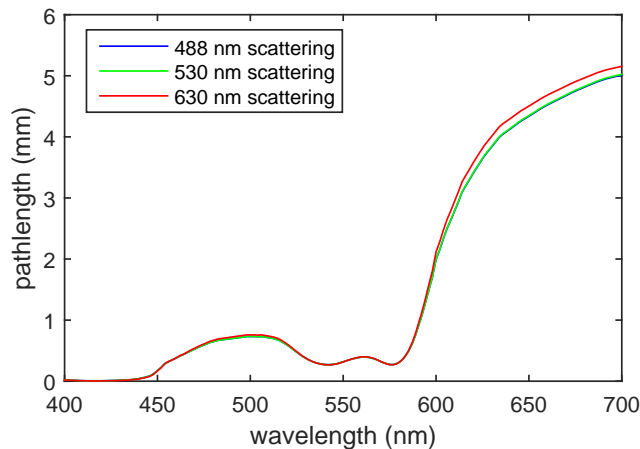

**Supp Figure 2. Plots of average pathlength calculated using scattering properties at three different wavelengths**

## 2) Modeling depth sensitivity

The plots shown in Figure 4 of the main paper were generated using a different form of Monte Carlo modeling. Using the parameters tabulated above, including absorption, the model was run to simulate light entering the tissue at an NA of 0.12. In this case, the amount of light reaching each point within the 3D volume was added up (based on the cumulative decrease in probability of existing, given the photon's pathlength through the absorbing medium). At each point, the average direction of propagation of each visiting photon was also recorded. Given the cylindrical symmetry of the geometry, and to reduce both the time needed to run the model, and the size of the data produced, data was logged as a 2D distribution of intensities and propagation angles across  $r$  (radius from the source) and  $z$  (depth).

To estimate the average chance of a photon entering the tissue, visiting a point  $r,z$ , and then exiting the tissue again and reaching the camera, we can again use reciprocity. The probability of light incident at the surface reaching a given depth in the medium is equivalent to the sum of all probabilities in our model across  $x$  and  $y$  for a given depth  $z$  (equivalent to translating and summing the source over the whole uniform field of view). The probability of a photon emerging from a point in the tissue and exiting at the pixel of interest at an angle acceptable to the camera lens is equal to the intensity of the light reaching any point in the medium after entering at that pixel location with an angle less than or equal to the detection NA. The combined probability is then the product of these two distributions: the probability of reaching a point  $r,z$  and the probability of making it back out again. This probability equates to the amount of change in a measurement that would occur for a given change in the absorption coefficient at that location (for small changes that can be assumed linear). Given that light is directional for reflectance imaging across these relatively small distances (<1 mm) one additional consideration was that the direction of propagation of the incoming and outgoing light was accounted for via the dot product of the light direction vector. A similar strategy is described here [3-5].

### **Tabulated estimated pathlength values for in-vivo rat / mouse brain with wide-field illumination and detection:**

| Wavelength (nm) | Estimated average pathlength X (mm) |
|-----------------|-------------------------------------|
| 400             | 0.022148                            |
| 402             | 0.01959                             |
| 404             | 0.016739                            |
| 406             | 0.013091                            |
| 408             | 0.009544                            |
| 410             | 0.007862                            |
| 412             | 0.006824                            |
| 414             | 0.00613                             |
| 416             | 0.006034                            |

|     |          |
|-----|----------|
| 418 | 0.006016 |
| 420 | 0.006615 |
| 422 | 0.007661 |
| 424 | 0.009103 |
| 426 | 0.010869 |
| 428 | 0.012758 |
| 430 | 0.014514 |
| 432 | 0.016324 |
| 434 | 0.021095 |
| 436 | 0.025688 |
| 438 | 0.030731 |
| 440 | 0.042163 |
| 442 | 0.051656 |
| 444 | 0.071701 |
| 446 | 0.087201 |
| 448 | 0.121648 |
| 450 | 0.173374 |
| 452 | 0.225728 |
| 454 | 0.288434 |
| 456 | 0.322998 |
| 458 | 0.347592 |
| 460 | 0.377372 |
| 462 | 0.412918 |
| 464 | 0.433427 |
| 466 | 0.467785 |
| 468 | 0.499849 |
| 470 | 0.526691 |
| 472 | 0.554803 |
| 474 | 0.580816 |
| 476 | 0.604492 |
| 478 | 0.626572 |
| 480 | 0.64898  |
| 482 | 0.666149 |
| 484 | 0.67508  |
| 486 | 0.683987 |
| 488 | 0.692555 |
| 490 | 0.697841 |
| 492 | 0.705741 |
| 494 | 0.714562 |
| 496 | 0.723036 |
| 498 | 0.730719 |
| 500 | 0.73081  |

|     |          |
|-----|----------|
| 502 | 0.731133 |
| 504 | 0.727479 |
| 506 | 0.731214 |
| 508 | 0.721874 |
| 510 | 0.712537 |
| 512 | 0.700563 |
| 514 | 0.685225 |
| 516 | 0.664134 |
| 518 | 0.625646 |
| 520 | 0.58763  |
| 522 | 0.544338 |
| 524 | 0.49737  |
| 526 | 0.45224  |
| 528 | 0.410981 |
| 530 | 0.371713 |
| 532 | 0.338528 |
| 534 | 0.315274 |
| 536 | 0.295698 |
| 538 | 0.282444 |
| 540 | 0.272231 |
| 542 | 0.269437 |
| 544 | 0.272728 |
| 546 | 0.281333 |
| 548 | 0.296392 |
| 550 | 0.316101 |
| 552 | 0.336472 |
| 554 | 0.355977 |
| 556 | 0.374246 |
| 558 | 0.383791 |
| 560 | 0.392168 |
| 562 | 0.396586 |
| 564 | 0.390147 |
| 566 | 0.373314 |
| 568 | 0.3498   |
| 570 | 0.324347 |
| 572 | 0.299444 |
| 574 | 0.280016 |
| 576 | 0.271559 |
| 578 | 0.278296 |
| 580 | 0.306261 |
| 582 | 0.354421 |
| 584 | 0.434922 |

|     |          |
|-----|----------|
| 586 | 0.542064 |
| 588 | 0.677941 |
| 590 | 0.847256 |
| 592 | 1.040145 |
| 594 | 1.252074 |
| 596 | 1.481586 |
| 598 | 1.702211 |
| 600 | 1.998288 |
| 602 | 2.156612 |
| 604 | 2.342275 |
| 606 | 2.51064  |
| 608 | 2.645002 |
| 610 | 2.794747 |
| 612 | 2.940892 |
| 614 | 3.100511 |
| 616 | 3.205588 |
| 618 | 3.305013 |
| 620 | 3.410977 |
| 622 | 3.506547 |
| 624 | 3.602268 |
| 626 | 3.693374 |
| 628 | 3.771878 |
| 630 | 3.846483 |
| 632 | 3.924145 |
| 634 | 4.000972 |
| 636 | 4.053497 |
| 638 | 4.096681 |
| 640 | 4.140704 |
| 642 | 4.185688 |
| 644 | 4.231663 |
| 646 | 4.274555 |
| 648 | 4.311313 |
| 650 | 4.348707 |
| 652 | 4.386754 |
| 654 | 4.425469 |
| 656 | 4.464193 |
| 658 | 4.502907 |
| 660 | 4.535122 |
| 662 | 4.565273 |
| 664 | 4.595836 |
| 666 | 4.626793 |
| 668 | 4.657428 |

|     |          |
|-----|----------|
| 670 | 4.687721 |
| 672 | 4.718404 |
| 674 | 4.748249 |
| 676 | 4.775131 |
| 678 | 4.801533 |
| 680 | 4.82704  |
| 682 | 4.852812 |
| 684 | 4.878841 |
| 686 | 4.905157 |
| 688 | 4.928464 |
| 690 | 4.948468 |
| 692 | 4.964616 |
| 694 | 4.980853 |
| 696 | 4.995942 |
| 698 | 5.009848 |
| 700 | 5.023943 |

#### Supplemental Material references:

1. Prahl, S.A., Online resource: <http://omlc.ogi.edu/spectra/hemoglobin/summary.html>.
2. van-der-Zee, P., *Measurement and modelling of the optical properties of human tissue in the near infrared*, in *Department of Medical Physics and Bioengineering*. 1992, University College London: London. p. 313.
3. Hillman, E.M.C., D.A. Boas, A.M. Dale, and A.K. Dunn, *Laminar Optical Tomography: demonstration of millimeter-scale depth-resolved imaging in turbid media*. *Opt. Lett.*, 2004. **29**(14): p. 1650-1652.
4. Hillman, E.M., A. Devor, M.B. Bouchard, A.K. Dunn, G.W. Krauss, J. Skoch, B.J. Bacskai, A.M. Dale, and D.A. Boas, *Depth-resolved optical imaging and microscopy of vascular compartment dynamics during somatosensory stimulation*. *Neuroimage*, 2007. **35**(1): p. 89-104.
5. Dunn, A.K. and D.A. Boas, *Transport-based image reconstruction in turbid media with small source–detector separations*. *Opt. Lett.*, 2000. **25**(24): p. 1777-1779.
